# Supplementary material for: Preparation of a Crosslinked Poly(imide-siloxane) for Application to Transistor Insulation
Source: MDPI journal article supplement (doi:10.3390/polym14245392), 2022-12-09
Supplement: s1 [file s1]

# Preparation of a Crosslinked Poly(imide-siloxane) for Application to Transistor Insulation

Hyeong-Joo Park, Ju-Young Choi, Seung-Won Jin, Seung-Hyun Lee, Yun-Je Choi, Dam-Bi Kim and Chan-Moon Chung \*

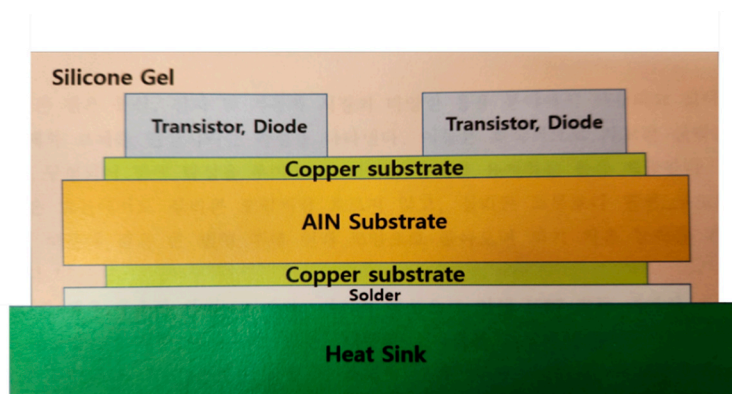

**Figure S1.** Schematic diagram of a typical IGBT module.

## Characterization of IGBT silicone gel

The structure of the commercial IGBT silicone gel was identified by FT-IR spectroscopy. Absorption bands were observed at 1023 and 1098  $\text{cm}^{-1}$  due to Si-O-Si stretching, and the absorption band of 1262  $\text{cm}^{-1}$  is due to the symmetrical deformation of the  $-\text{CH}_3$  group of  $-\text{Si}(\text{CH}_3)_2-$  group. The absorption band of 803  $\text{cm}^{-1}$  corresponds to Si-C group of Si- $\text{CH}_3$  vibration. It is considered that the silicone gel is a PDMS-based material because the IR spectrum of the gel is practically the same as that of PDMS.

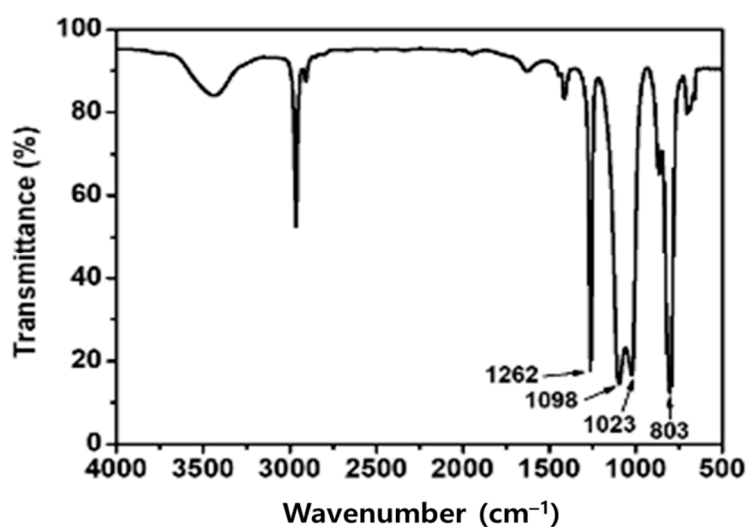

**Figure S2.** FT-IR spectrum of the commercial IGBT silicone gel.

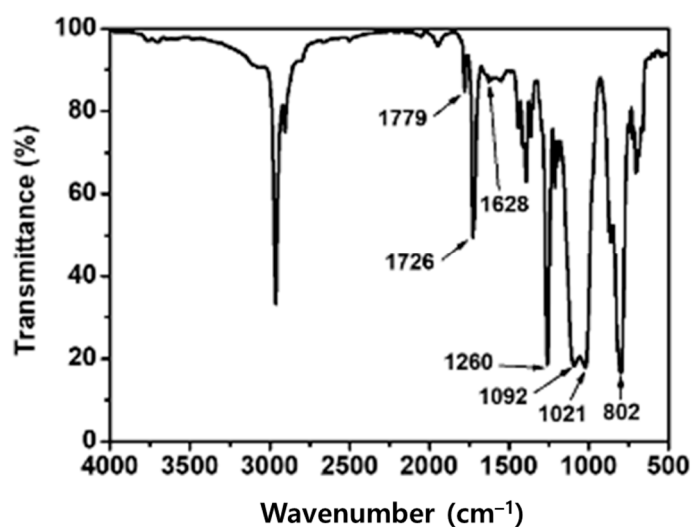

Figure S3. FT-IR spectrum of Allyl-PI.

Table S1. Remaining percent of Si-H groups.

| Temperature (°C)    | Residue (%) |
|---------------------|-------------|
| Before Crosslinking | 100         |
| 40                  | 91          |
| 70                  | 80          |
| 100                 | 53          |
| 120                 | 17          |
| 140                 | 3           |

Table S2. Thermal properties of the commercial IGBT silicone gel.

|                   | T <sub>d</sub> (°C)         |                              | Thermal diffusivity (m <sup>2</sup> /s) | Density (g/cm <sup>3</sup> ) | Specific heat capacity (J/g • K) | Thermal conductivity (W/m • K) |
|-------------------|-----------------------------|------------------------------|-----------------------------------------|------------------------------|----------------------------------|--------------------------------|
|                   | T <sub>5</sub> <sup>a</sup> | T <sub>10</sub> <sup>b</sup> |                                         |                              |                                  |                                |
| IGBT silicone gel | 378                         | 422                          | 0.12                                    | 1.00                         | 1.67                             | 0.19                           |

<sup>a</sup> Temperature at which a sample exhibits 5 wt% decomposition in a nitrogen atmosphere; <sup>b</sup> Temperature at which a sample exhibits 10 wt% decomposition in a nitrogen atmosphere.

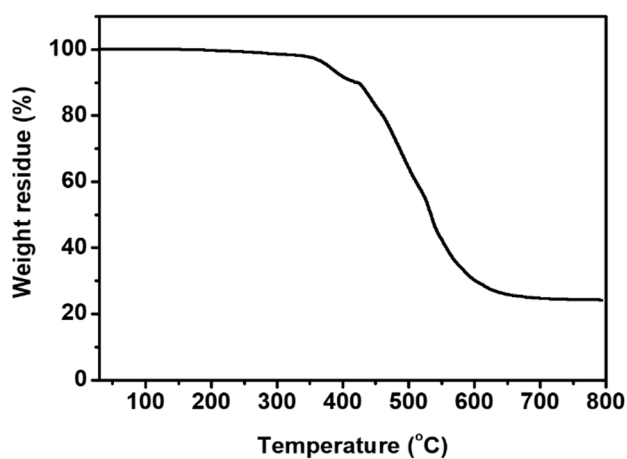

Figure S4. TGA curve of the commercial IGBT silicone gel.

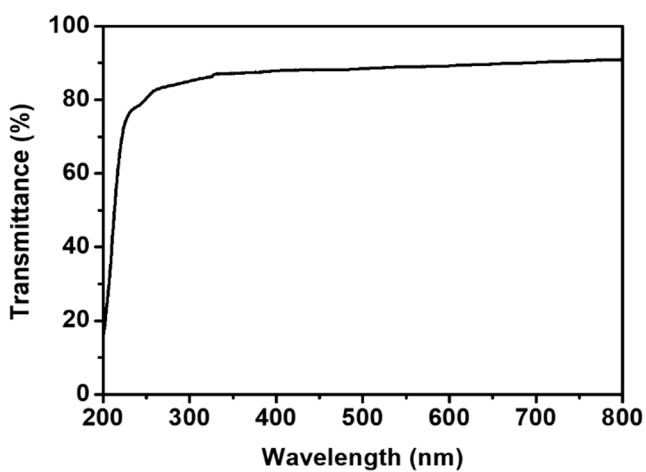

Figure S5. Transmittance of the commercial IGBT silicone gel.

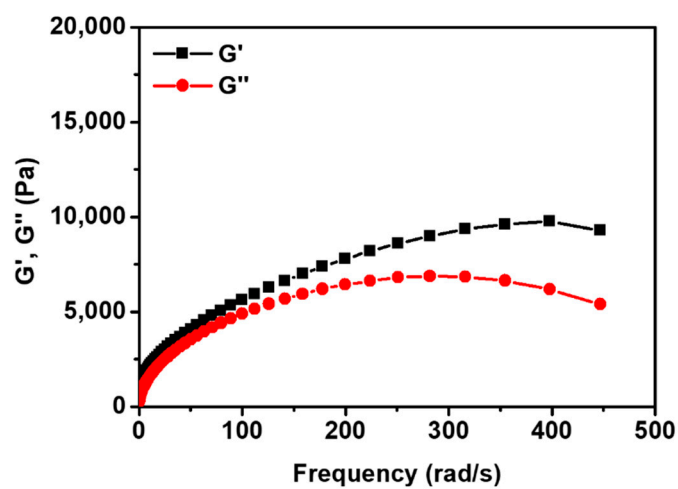

Figure S6. Storage modulus ( $G'$ ) and loss modulus ( $G''$ ) of the commercial IGBT silicone gel.
